# Supplementary material
Source: publisher figshare collection journal article supplement (https://sage.figshare.com/ndownloader/files/14014448)
Supplement: Supplementary file 1 [file 14014448]

**Appendix II:** Automated Dispensing Cabinet “Override” Medication List

| Analgesics, anxiolytics, and sedative agents | Lidocaine Injection  Propofol Injection  Fentanyl Injection  Hydromorphone Injection  Lorazepam Injection  Midazolam Injection  Morphine Injection |
| --- | --- |
| Cardiac and vasoactive agents | Adenosine Injection  Amiodarone Intravenous Infusion  Atropine Injection  Diltiazem Injection  Dopamine Intravenous infusion  Dobutamine Intravenous infusion  Ephedrine Injection  Epinephrine Injection, Intravenous infusion  Furosemide Injection  Labetolol Injection  Lidocaine Intravenous infusion  Metoprolol Injection  Nicardipine Intravenous Infusion  Nitroglycerin Intravenous Infusion  Nitroprusside Injection  Norepinephrine Intravenous Infusion  Phenylephrine Injection, Intravenous Infusion  Vasopressin Intravenous Infusion |
| Antithrombotic agents | Alteplase Injection  Aspirin Tablets |
| Pulmonary agents | Albuterol nebulizer solution |
| Reversal agents | Flumazenil Injection  Dextrose 50% in Water Injection  Glucagon Injection  Naloxone Injection |
| Neuroactive agents | Haloperidol Injection  Phenytoin Injection |
| Rapid sequence intubation | Etomidate Injection  Rocuronium Injection  Succinylcholine Injection |
| Other | Calcium Chloride Injection  Dexamethasone Injection  Diphenhydramine Injection  Hydrocortisone Sodium Succinate Injection  Magnesium Sulfate Injection  Mannitol Intravenous Infusion  Sodium Bicarbonate Injection |
